# Supplementary material
Source: PubMed Central journal article supplement (PMC5862739)
Supplement: NIHMS908035-supplement-Supp_TableS1-2.pdf [file NIHMS908035-supplement-Supp_TableS1-2.pdf]

**Table S1.** Perinatal/neonatal outcomes, in infants with one or more factors and in healthy infants

|                                                 | Infants with pathological factors (i.e., A-D)<br>(3.95%*) |                   |                   |                   |                      | Infants with no<br>pathological factor<br>(96.05%) |
|-------------------------------------------------|-----------------------------------------------------------|-------------------|-------------------|-------------------|----------------------|----------------------------------------------------|
|                                                 | A only<br>(1.46%)                                         | B only<br>(1.46%) | C only<br>(0.48%) | D only<br>(0.48%) | >1 factor<br>(0.05%) |                                                    |
| <b>Fetal deaths, %</b>                          | 0.19                                                      | 0.38              | 0.63              | 0.47              | 0.61                 | 0.149                                              |
| <b>Neonatal deaths among<br/>live births, %</b> | 0.19                                                      | 0.37              | 9.22              | 12.67             | 19.00                | 0.058                                              |
| <b>Survived, %</b>                              | 99.63                                                     | 99.25             | 90.15             | 86.85             | 80.38                | 99.79                                              |
| <b>Preterm live births, %</b>                   | 47.55                                                     | 47.64             | 89.51             | 94.76             | 92.57                | 4.0                                                |

\* Sub-column percentages do not total to 3.95% due to rounding

**Table S2.** Week-specific odds ratios quantifying the association of factors B and D with neonatal death, and percent bias compared to true odds ratio, at  $\leq 32$  weeks' gestation

| Week of gestation | B as index cause |         |                  | C as index cause |         |                  |
|-------------------|------------------|---------|------------------|------------------|---------|------------------|
|                   | Calculated OR    | True OR | Percent bias (%) | Calculated OR    | True OR | Percent bias (%) |
| 22                | 3.03             | 3.0     | 1                | 1.11             | 2.00    | -89              |
| 23                | 3.00             | 3.0     | 0                | 1.08             | 2.40    | -94              |
| 24                | 2.98             | 3.0     | -1               | 1.06             | 2.88    | -97              |
| 25                | 2.95             | 3.0     | -2               | 1.05             | 3.46    | -98              |
| 26                | 2.88             | 3.0     | -6               | 1.04             | 4.15    | -99              |
| 27                | 2.69             | 3.0     | -16              | 1.03             | 4.98    | -99              |
| 28                | 2.27             | 3.0     | -37              | 1.03             | 5.98    | -99              |
| 29                | 1.57             | 3.0     | -72              | 1.05             | 7.18    | -99              |
| 30                | 0.90             | 3.0     | -105             | 1.14             | 8.62    | -98              |
| 31                | 0.54             | 3.0     | -123             | 1.39             | 10.35   | -96              |
| 32                | 0.41             | 3.0     | -130             | 2.02             | 12.42   | -91              |
